# Supplementary material for: Multifunctional carbazolocarbazoles as hole transporting and emitting host materials in red phosphorescent OLEDs
Source: Royal Society of Chemistry journal article supplement (doi:10.1039/c3tc30193a), 2013-01-01
Supplement: c3tc30193a.pdf [file c3tc30193a.pdf]

# Multifunctional carbazolocarbazoles as hole transporting and host materials in red phosphorescent OLEDs

David Curiel,\* Miriam Más-Montoya, Chih-Hao Chang,\* Pin-Yang Chen, Cheng-Wei Tai and Alberto Tárraga

## Electronic Supplementary Information

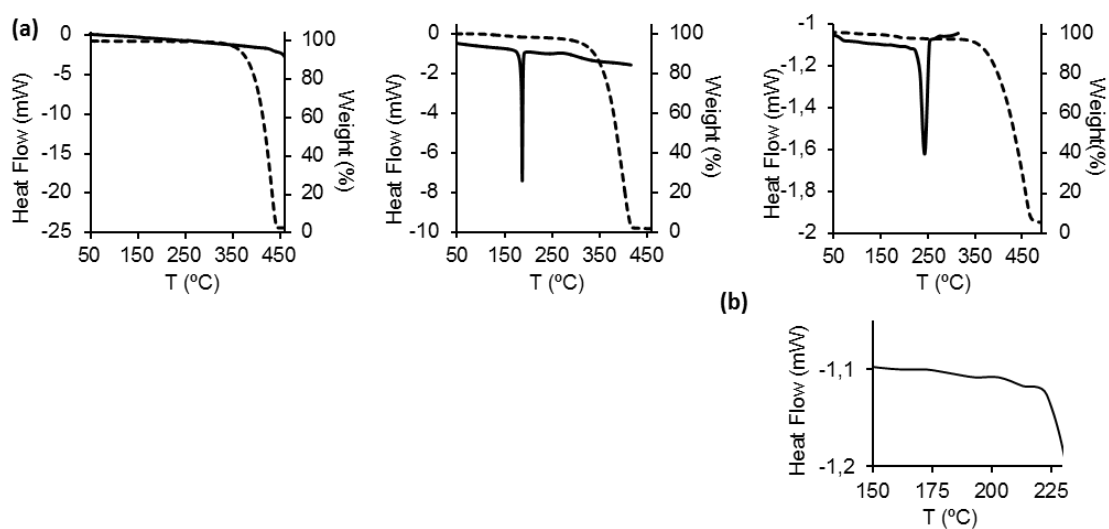

**Fig. 1** (a) Thermogravimetric Analysis (dashed line) and Differential Scanning Calorimetry (continuous line) of compounds **1** (left), **2** (centre) and **3** (right). (b) Expanded thermogram.
